# Supplementary material for: An MRD-stratified pediatric protocol is as deliverable in adolescents and young adults as in children with ALL
Source: PubMed Central journal article supplement — Blood Adv. 2021 Dec 20;5(24):5574–83. doi: 10.1182/bloodadvances.2021005576 (PMC8714725; doi:10.1182/bloodadvances.2021005576), 2021-12-20
Supplement: advancesADV2021005576-suppl2.pdf [file advancesADV2021005576-suppl2.pdf]

## **Supplementary Data**

**ALL06 Study Protocol version 5.0 (09 June 2017)**

To be included in supplementary data

Table S1. Grade 3 and 4 Adverse Events in Protocol I

| Achieved Protocol M/HR by Day 94 (n=34)     |       |   |            | Did not Achieve Protocol M/HR by Day 94 (n=48) |       |   |            |
|---------------------------------------------|-------|---|------------|------------------------------------------------|-------|---|------------|
| Toxicity                                    | Grade |   |            | Toxicity                                       | Grade |   |            |
|                                             | 3     | 4 | Total (n=) |                                                | 3     | 4 | Total (n=) |
| <i>Acute kidney injury</i>                  | 1     |   | 1          | <i>Acute kidney injury</i>                     |       |   |            |
| <i>Alanine aminotransferase increased</i>   | 2     |   | 2          | <i>Alanine aminotransferase increased</i>      | 5     |   | 5          |
| <i>Alkaline phosphatase increased</i>       | 2     |   | 2          | <i>Alkaline phosphatase increased</i>          |       |   |            |
| <i>Anemia</i>                               | 31    | 1 | 32         | <i>Anemia</i>                                  | 13    | 1 | 14         |
| <i>Anorexia</i>                             |       |   |            | <i>Anorexia</i>                                | 1     |   | 1          |
| <i>Arachnoiditis</i>                        | 1     |   | 1          | <i>Arachnoiditis</i>                           |       |   |            |
| <i>Aspartate aminotransferase increased</i> | 2     |   | 2          | <i>Aspartate aminotransferase increased</i>    | 1     |   | 1          |
| <i>Atrial fibrillation</i>                  | 1     |   | 1          | <i>Atrial fibrillation</i>                     |       |   |            |
| <i>Blood bilirubin increased</i>            | 1     |   | 1          | <i>Blood bilirubin increased</i>               | 4     | 1 | 5          |
| <i>Colitis</i>                              | 2     |   | 2          | <i>Colitis</i>                                 |       |   |            |
| <i>Constipation</i>                         |       |   |            | <i>Constipation</i>                            | 1     |   | 1          |
| <i>Depression</i>                           |       |   |            | <i>Depression</i>                              | 1     |   | 1          |
| <i>Dystonia</i>                             |       |   |            | <i>Dystonia</i>                                | 1     |   | 1          |
| <i>Fatigue</i>                              | 2     |   | 2          | <i>Fatigue</i>                                 | 1     |   | 1          |
| <i>Febrile neutropenia</i>                  | 18    |   | 18         | <i>Febrile neutropenia</i>                     | 29    | 1 | 30         |
| <i>Fever</i>                                | 4     |   | 4          | <i>Fever</i>                                   | 1     |   | 1          |
| <i>Fibrinogen decreased</i>                 | 3     |   | 3          | <i>Fibrinogen decreased</i>                    | 2     |   | 2          |
| <i>Gastric perforation</i>                  |       | 1 | 1          | <i>Gastric perforation</i>                     |       |   |            |
| <i>GGT increased</i>                        | 2     |   | 2          | <i>GGT increased</i>                           | 4     |   | 4          |
| <i>Headache</i>                             | 5     |   | 5          | <i>Headache</i>                                | 2     |   | 2          |
| <i>Hematoma</i>                             |       |   |            | <i>Hematoma</i>                                | 1     |   | 1          |
| <i>Hepatic failure</i>                      |       |   |            | <i>Hepatic failure</i>                         |       | 1 | 1          |

|                                                       |    |    |    |                                                       |    |    |    |
|-------------------------------------------------------|----|----|----|-------------------------------------------------------|----|----|----|
| <i>Hepatobiliary disorders - Other</i>                | 2  |    | 2  | <i>Hepatobiliary disorders - Other</i>                | 4  |    | 4  |
| <i>Hyperammonemia</i>                                 |    |    |    | <i>Hyperammonemia</i>                                 |    | 1  | 1  |
| <i>Hyperglycemia</i>                                  | 2  |    | 2  | <i>Hyperglycemia</i>                                  | 3  |    | 3  |
| <i>Hypertension</i>                                   | 1  |    | 1  | <i>Hypertension</i>                                   | 1  |    | 1  |
| <i>Hypertriglyceridemia</i>                           |    |    |    | <i>Hypertriglyceridemia</i>                           | 1  |    | 1  |
| <i>Hypoalbuminemia</i>                                | 1  |    | 1  | <i>Hypoalbuminemia</i>                                |    |    |    |
| <i>Hypokalemia</i>                                    |    |    |    | <i>Hypokalemia</i>                                    | 1  |    | 1  |
| <i>Hyponatremia</i>                                   | 2  |    | 2  | <i>Hyponatremia</i>                                   | 2  |    | 2  |
| <i>Hypotension</i>                                    | 1  |    | 1  | <i>Hypotension</i>                                    |    |    |    |
| <i>Infections and infestations</i>                    | 8  |    | 8  | <i>Infections and infestations</i>                    | 19 | 2  | 21 |
| <i>Lower gastrointestinal hemorrhage</i>              |    |    |    | <i>Lower gastrointestinal hemorrhage</i>              |    | 1  | 1  |
| <i>Mucositis oral</i>                                 | 1  |    | 1  | <i>Mucositis oral</i>                                 | 2  |    | 2  |
| <i>Musculoskeletal and connective tissue disorder</i> | 4  |    | 4  | <i>Musculoskeletal and connective tissue disorder</i> | 3  |    | 3  |
| <i>Nausea</i>                                         | 2  |    | 2  | <i>Nausea</i>                                         | 3  |    | 3  |
| <i>Nervous system disorders - Other</i>               |    |    |    | <i>Nervous system disorders - Other</i>               | 1  |    | 1  |
| <i>Neutrophil count decreased</i>                     | 13 | 24 | 37 | <i>Neutrophil count decreased</i>                     | 9  | 25 | 34 |
| <i>Oral pain</i>                                      | 1  |    | 1  | <i>Oral pain</i>                                      |    |    |    |
| <i>Pain</i>                                           | 1  |    | 1  | <i>Pain</i>                                           |    |    |    |
| <i>Pancreatitis</i>                                   |    |    |    | <i>Pancreatitis</i>                                   |    | 1  | 1  |
| <i>Platelet count decreased</i>                       | 12 | 19 | 31 | <i>Platelet count decreased</i>                       | 18 | 22 | 40 |
| <i>Respiratory failure</i>                            |    |    |    | <i>Respiratory failure</i>                            |    | 2  | 2  |
| <i>Seizure</i>                                        |    |    |    | <i>Seizure</i>                                        |    | 1  | 1  |
| <i>Sepsis</i>                                         |    |    |    | <i>Sepsis</i>                                         |    | 1  | 1  |
| <i>Sinus tachycardia</i>                              | 1  |    | 1  | <i>Sinus tachycardia</i>                              |    |    |    |
| <i>Thromboembolic event</i>                           | 2  |    | 2  | <i>Thromboembolic event</i>                           | 1  | 3  | 4  |
| <i>Urinary retention</i>                              | 1  |    | 1  | <i>Urinary retention</i>                              |    |    |    |
| <i>Urticaria</i>                                      | 1  |    | 1  | <i>Urticaria</i>                                      |    |    |    |
| <i>Vomiting</i>                                       | 2  |    | 2  | <i>Vomiting</i>                                       | 2  |    | 2  |
| <i>Weight gain</i>                                    | 1  |    | 1  | <i>Weight gain</i>                                    |    |    |    |

|                                   |            |           |            |                                   |            |           |            |
|-----------------------------------|------------|-----------|------------|-----------------------------------|------------|-----------|------------|
| <i>Weight loss</i>                | 1          |           | 1          | <i>Weight loss</i>                | 1          |           | 1          |
| <i>White blood cell decreased</i> | 2          | 1         | 3          | <i>White blood cell decreased</i> | 3          | 2         | 5          |
| <b>Total</b>                      | <b>139</b> | <b>46</b> | <b>185</b> | <b>Total</b>                      | <b>141</b> | <b>65</b> | <b>206</b> |

**Table S2. Selected Post-Hoc Adverse Event Analysis**

| Toxicity                   | Achieved Protocol M/HR1 by Day 94 (n=34) |                  | Not Achieved Protocol M/HR1 by Day 94 (n=48) |                  | P-values |          |
|----------------------------|------------------------------------------|------------------|----------------------------------------------|------------------|----------|----------|
|                            | Events (n=)                              | Patients (n=, %) | Events (n=)                                  | Patients (n=, %) | Events   | Patients |
| All Grades                 | 185                                      | 32 (94)          | 206                                          | 41 (85)          | 0.019    | 0.141    |
| Grade 4 only               | 46                                       | 19 (56)          | 65                                           | 31 (65)          | 0.996    | 0.133    |
| Hepatic*                   | 11                                       | 6 (18)           | 19                                           | 11 (23)          | 0.499    | 0.160    |
| Asparaginase-related**     | 16                                       | 12 (35)          | 30                                           | 18 (38)          | 0.302    | 0.170    |
| Grade 4 neutropenia        | 24                                       | 17 (50)          | 26                                           | 19 (40)          | 0.348    | 0.116    |
| Anemia                     | 32                                       | 16 (47)          | 14                                           | 11 (23)          | <0.001   | 0.014    |
| Grade 4 non-hematologic*** | 2                                        | 2 (6)            | 15                                           | 12 (25)          | 0.013    | 0.018    |

\*Hepatic toxicity defined as alanine aminotransferase increased, alkaline phosphatase increased, blood bilirubin increased, GGT increased, hepatic failure, hepatobiliary disorders – other.

\*\*Asparaginase-related toxicity defined as alanine aminotransferase increased, alkaline phosphatase increased, blood bilirubin increased, fibrinogen decreased, GGT increased, hepatic failure, hepatobiliary disorders – other, hyperammonemia, hyperglycemia, hypertriglyceridemia, pancreatitis, thromboembolic event

\*\*\*Grade 4 non-hematologic toxicity defined as all grade 4 events that did not include anemia, neutrophil count decreased, platelet count decreased, white blood cell decreased.

**Table S3. Factors Associated with Day 79 MRD Negativity**

| Day 79 MRD Status |         | Negative (N, %) |       | Positive (N, %) |       | p-value | OR* (for +) | 95%CI     |
|-------------------|---------|-----------------|-------|-----------------|-------|---------|-------------|-----------|
| Sex               | Female  | 10              | 55.6% | 8               | 44.4% | 0.76    | 0.85        | 0.29-2.50 |
|                   | Male    | 31              | 59.6% | 21              | 40.4% |         |             |           |
| Age               | ≤Median | 20              | 55.6% | 16              | 44.4% | 0.598   | 0.77        | 0.30-2.01 |
|                   | >Median | 21              | 61.8% | 13              | 38.2% |         |             |           |
| Phenotype         | B       | 28              | 54.9% | 23              | 45.1% | 0.115   | 0.37        | 0.11-1.31 |
|                   | T       | 13              | 76.5% | 4               | 23.5% |         |             |           |
| Time to M/HR1     | ≤Median | 25              | 61.0% | 16              | 39.0% | 0.627   | 1.27        | 0.48-3.33 |
|                   | >Median | 16              | 55.2% | 13              | 44.8% |         |             |           |

\*Odds ratio for a positive MRD result at day 79

**Table S4. Assessment of MRD Response through HR Therapy**

| HR Block         | Mean Change in Absolute MRD Value Relative to Day 79 Result* |                          |                          |
|------------------|--------------------------------------------------------------|--------------------------|--------------------------|
|                  | 1                                                            | 2                        | 3                        |
| No Relapse/Alive | - 1.58 x 10 <sup>-3</sup>                                    | - 1.2 x 10 <sup>-3</sup> | - 1.2 x 10 <sup>-3</sup> |
| Relapse/Died     | - 1.72 x 10 <sup>-3</sup>                                    | + 9.5 x 10 <sup>-4</sup> | + 6.4 x 10 <sup>-3</sup> |
| p-value          | 0.929                                                        | 0.032                    | 0.038                    |

\* (-) indicates an absolute fall in MRD value, (+) indicates an absolute increase in MRD value

**Table S5. Survival Outcomes Following SCT**

| Time    | Transplant | DFS ( $p=0.763$ ) |            | OS ( $p=0.876$ ) |             |
|---------|------------|-------------------|------------|------------------|-------------|
|         |            | %                 | 95%CI      | %                | 95%CI       |
| 1 year  | No         | 84.7              | 75.6-93.9  | 85.5             | 76.7-94.3   |
|         | Yes        | 95.0              | 85.4-104.6 | 100.0            | 100.0-100.0 |
| 3 years | No         | 69.5              | 57.1-81.8  | 75.0             | 64.0-86.0   |
|         | Yes        | 75.0              | 56.0-94.0  | 75.0             | 56.0-94.0   |

Figure S1. ALL06 Treatment Protocol Summary

|                                                                                                                                                                                                                                                                                                                                                                                                                                                                                                                                                                                                                                                                                                                                                                                                                                                                                                                                                                                                                                                                                                                                                                                                                                                                                                                                                                                                                                                                                                                                                                                                                                                                                                                                                                                                                                                                                                                                                                                                                                                                                                                                                            |                                                                                                                                                                                                                                                                                                                                                                                                                                                                                                                                                                                                                                                                                                                                                                                                                                                                                                                                                                                                                                                                                                                                                                                                                                                                                                                                                                                                                                                                                                                                                                                                                                                                  |
|------------------------------------------------------------------------------------------------------------------------------------------------------------------------------------------------------------------------------------------------------------------------------------------------------------------------------------------------------------------------------------------------------------------------------------------------------------------------------------------------------------------------------------------------------------------------------------------------------------------------------------------------------------------------------------------------------------------------------------------------------------------------------------------------------------------------------------------------------------------------------------------------------------------------------------------------------------------------------------------------------------------------------------------------------------------------------------------------------------------------------------------------------------------------------------------------------------------------------------------------------------------------------------------------------------------------------------------------------------------------------------------------------------------------------------------------------------------------------------------------------------------------------------------------------------------------------------------------------------------------------------------------------------------------------------------------------------------------------------------------------------------------------------------------------------------------------------------------------------------------------------------------------------------------------------------------------------------------------------------------------------------------------------------------------------------------------------------------------------------------------------------------------------|------------------------------------------------------------------------------------------------------------------------------------------------------------------------------------------------------------------------------------------------------------------------------------------------------------------------------------------------------------------------------------------------------------------------------------------------------------------------------------------------------------------------------------------------------------------------------------------------------------------------------------------------------------------------------------------------------------------------------------------------------------------------------------------------------------------------------------------------------------------------------------------------------------------------------------------------------------------------------------------------------------------------------------------------------------------------------------------------------------------------------------------------------------------------------------------------------------------------------------------------------------------------------------------------------------------------------------------------------------------------------------------------------------------------------------------------------------------------------------------------------------------------------------------------------------------------------------------------------------------------------------------------------------------|
| <p><b>Standard/Medium Risk Protocol</b></p> <p><b>Prephase</b></p> <ul style="list-style-type: none"> <li>• Prednisone PO/IV 60mg/m<sup>2</sup>/day in two divided doses days 1-7</li> <li>• IT MTX 12mg day 1</li> </ul> <p><b>Protocol I: Induction</b></p> <ul style="list-style-type: none"> <li>• Vincristine IV 1.5mg/m<sup>2</sup> (max 2 mg) days 8, 16, 22, 29</li> <li>• Prednisone PO/IV 60mg/day/m<sup>2</sup> in three divided dose days 8-28 then tapered</li> <li>• Daunorubicin IV 30mg/m<sup>2</sup> days 8, 15, 22, 29</li> <li>• Pegylated asparaginase IM/IV 1000 IU/m<sup>2</sup> days 8, 22</li> <li>• IT MTX 12mg days 15, 33<sup>(a)</sup></li> </ul> <p><b>Protocol I: Consolidation</b></p> <ul style="list-style-type: none"> <li>• Cyclophosphamide IV 1000mg/m<sup>2</sup> days 36, 64</li> <li>• Mercaptopurine PO 60mg/m<sup>2</sup>/day, days 36-63</li> <li>• Cytarabine IV/SC 75mg/m<sup>2</sup> days 38-41, 45-48, 52-55, 59-62</li> <li>• IT MTX 12mg days 43, 57</li> </ul> <p><b>Protocol M</b></p> <ul style="list-style-type: none"> <li>• Mercaptopurine PO 25mg/m<sup>2</sup>/day PO days 1-56.</li> <li>• High dose MTX IV 5g/m<sup>2</sup> as a continuous infusion over 24 hours, days 8, 22, 36, 50 with leucovorin rescue</li> </ul> <p><b>Protocol II: Induction<sup>(b)</sup></b></p> <ul style="list-style-type: none"> <li>• Dexamethasone PO 10mg/m<sup>2</sup>/day in 2-3 divided doses, days 1-21 then tapered.</li> <li>• Vincristine IV 1.5mg/m<sup>2</sup> (max 2 mg) days 8, 15, 22, 29</li> <li>• Doxorubicin IV 25mg/m<sup>2</sup> days 8, 15, 22, 29</li> <li>• Pegylated asparaginase IM/IV 1000iU/m<sup>2</sup> day 1</li> </ul> <p><b>Protocol II: Consolidation</b></p> <ul style="list-style-type: none"> <li>• Thioguanine PO 60mg/m<sup>2</sup>/day, days 36-49</li> <li>• Cyclophosphamide IV 1000mg/m<sup>2</sup> day 36</li> <li>• Cytarabine IV/SC 75mg/m<sup>2</sup> days 38-41, 45-47</li> </ul> <p><b>Maintenance<sup>(c)</sup></b></p> <ul style="list-style-type: none"> <li>• Mercaptopurine PO 50mg/m<sup>2</sup> Daily</li> <li>• MTX 20mg/m<sup>2</sup>/weekly</li> </ul> | <p><b>High Risk Protocol</b></p> <p><b>HR Block 1<sup>(d)</sup></b></p> <ul style="list-style-type: none"> <li>• Dexamethasone PO/IV 20mg/m<sup>2</sup>/day, days 1-5</li> <li>• Vincristine IV 1.5mg/m<sup>2</sup> (max 2 mg) days 1, 6</li> <li>• Cytarabine IV 2000mg/m<sup>2</sup> twice daily day 5</li> <li>• High dose MTX IV 5000mg/m<sup>2</sup> as continuous infusion day 1 with leucovorin rescue</li> <li>• Cyclophosphamide IV 200mg/m<sup>2</sup> twice daily on days 2-4</li> <li>• Pegylated asparaginase 1000iU/m<sup>2</sup> on day 6</li> <li>• IT MTX 12mg/cytarabine 30mg/hydrocortisone 50mg on day 1</li> </ul> <p><b>HR Block 2</b></p> <ul style="list-style-type: none"> <li>• Dexamethasone PO/IV 20mg/m<sup>2</sup>/day, days 1-5</li> <li>• Vindesine IV 3mg/m<sup>2</sup>/day (max dose 5mg) days 1,6<sup>(e)</sup></li> <li>• Daunorubicin IV 30mg/m<sup>2</sup> day 5</li> <li>• High dose MTX IV 5g/m<sup>2</sup> as continuous infusion given on day 1 with leucovorin rescue</li> <li>• Ifosfamide IV 800mg/m<sup>2</sup> twice daily on days 2-4</li> <li>• Pegylated asparaginase IV/IM 1000iu/m<sup>2</sup> on day 6</li> <li>• IT MTX 12mg/cytarabine 30mg/hydrocortisone 50mg on day 1</li> </ul> <p><b>HR Block 3</b></p> <ul style="list-style-type: none"> <li>• Dexamethasone PO/IV 20mg/m<sup>2</sup>/day, days 1-5</li> <li>• Cytarabine IV 2000mg/m<sup>2</sup> twice daily on days 1,2</li> <li>• Etoposide IV 100mg/m<sup>2</sup> twice daily on days 3-5</li> <li>• Pegylated asparaginase IV/IM 1000iU/m<sup>2</sup> on day 6</li> <li>• IT MTX 12mg/cytarabine 30mg/hydrocortisone 50mg on day 1</li> </ul> |
|------------------------------------------------------------------------------------------------------------------------------------------------------------------------------------------------------------------------------------------------------------------------------------------------------------------------------------------------------------------------------------------------------------------------------------------------------------------------------------------------------------------------------------------------------------------------------------------------------------------------------------------------------------------------------------------------------------------------------------------------------------------------------------------------------------------------------------------------------------------------------------------------------------------------------------------------------------------------------------------------------------------------------------------------------------------------------------------------------------------------------------------------------------------------------------------------------------------------------------------------------------------------------------------------------------------------------------------------------------------------------------------------------------------------------------------------------------------------------------------------------------------------------------------------------------------------------------------------------------------------------------------------------------------------------------------------------------------------------------------------------------------------------------------------------------------------------------------------------------------------------------------------------------------------------------------------------------------------------------------------------------------------------------------------------------------------------------------------------------------------------------------------------------|------------------------------------------------------------------------------------------------------------------------------------------------------------------------------------------------------------------------------------------------------------------------------------------------------------------------------------------------------------------------------------------------------------------------------------------------------------------------------------------------------------------------------------------------------------------------------------------------------------------------------------------------------------------------------------------------------------------------------------------------------------------------------------------------------------------------------------------------------------------------------------------------------------------------------------------------------------------------------------------------------------------------------------------------------------------------------------------------------------------------------------------------------------------------------------------------------------------------------------------------------------------------------------------------------------------------------------------------------------------------------------------------------------------------------------------------------------------------------------------------------------------------------------------------------------------------------------------------------------------------------------------------------------------|

PO, oral; IV, intravenous; IT, intrathecal; SC, subcutaneous; MTX, methotrexate

- (a) In case of CNS involvement additional IT MTX was given on days 18, 27
- (b) Cranial irradiation (18Gy) was considered for initial CNS involvement, HR/VHR patients not proceeding to SCT and T-ALL with presenting WCC >100 x 10<sup>9</sup>/L
- (c) To a total of 2 years of therapy
- (d) MHR/HR/VHR patients received a minimum of HR1 and 2 if MRD<sup>neg</sup> following HR1 before proceeding to Protocol II or SCT if suitable donor available
- (e) Vincristine IV (1.5mg/m<sup>2</sup> to a max of 2mg) was substituted if drug was unavailable

Figure S2. Impact of Risk Group and Phenotype on Outcomes

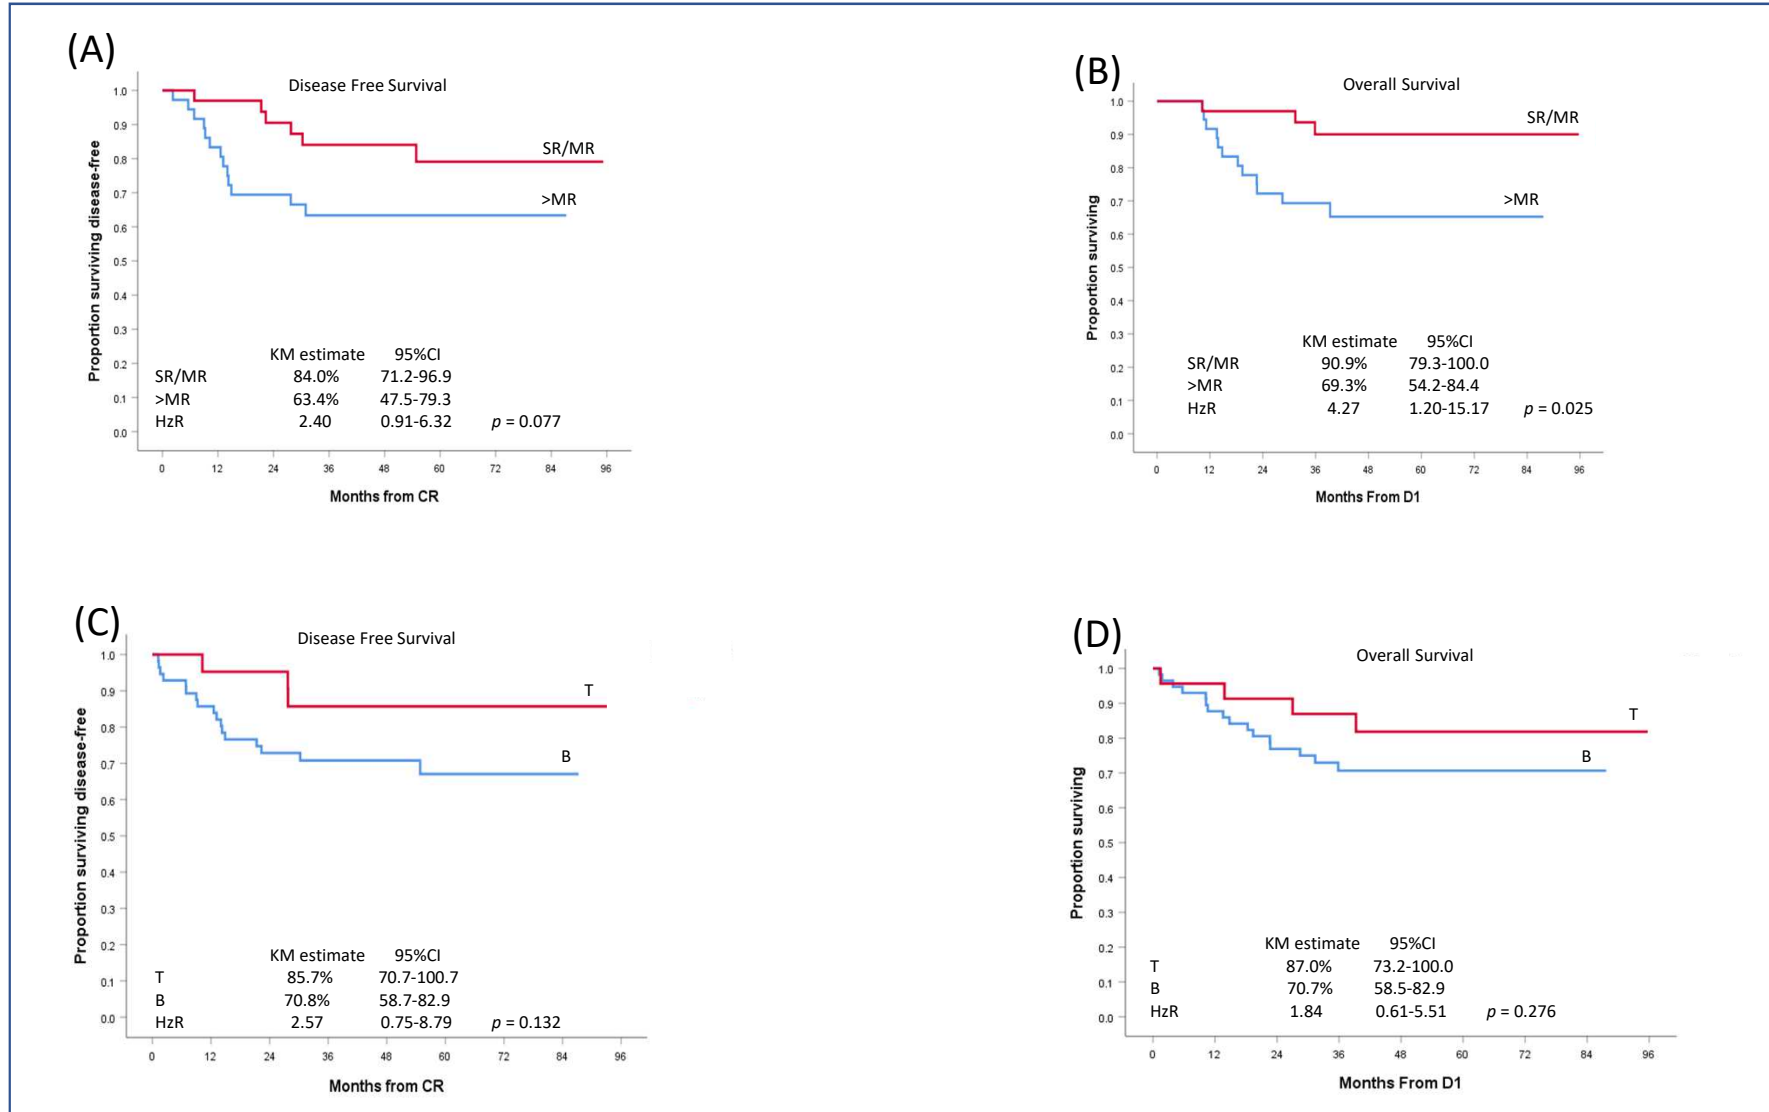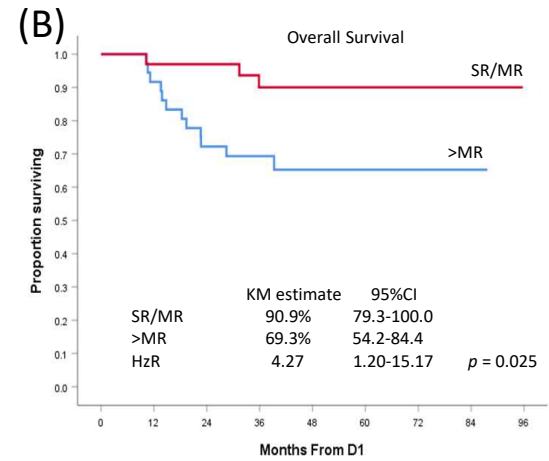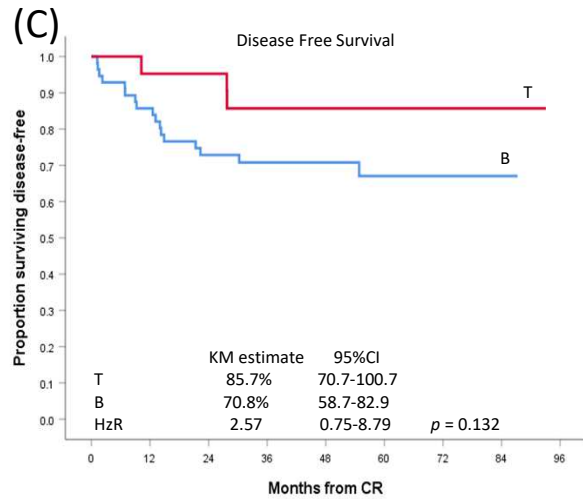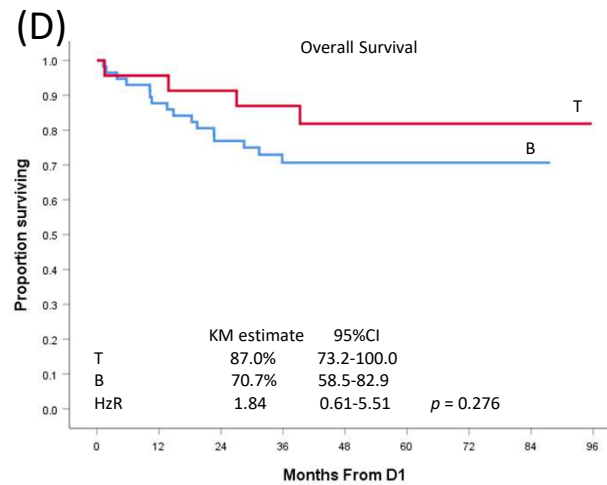



Figure S3. Overall Survival Following Relapse

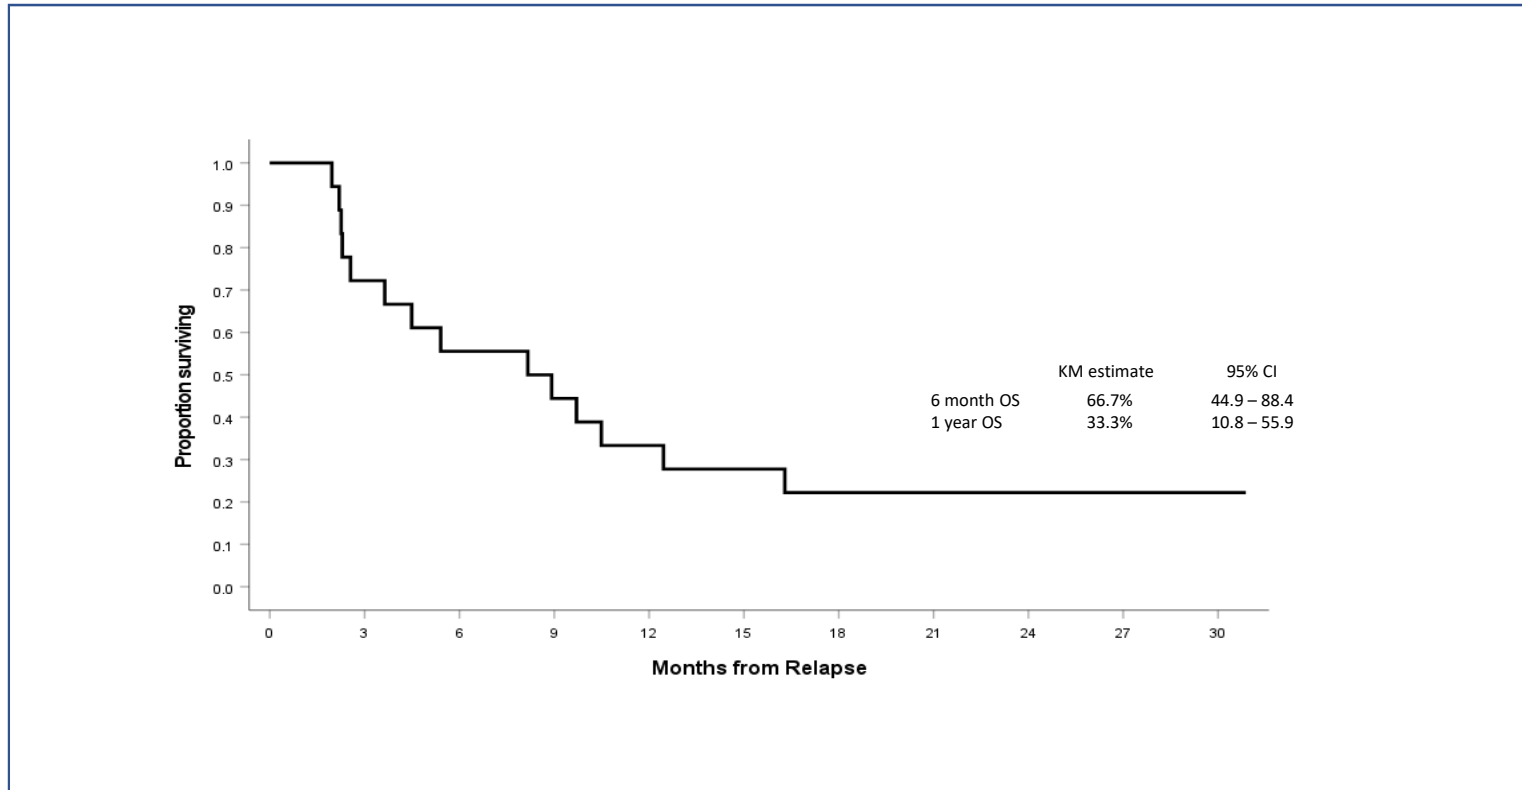

## Supplementary Figure Legends

**Figure S1. ALL06 Treatment Protocol Summary.** Standard/Medium Risk and High Risk protocols are shown. Patients considered MHR/HR or VHR proceeded to a minimum of HR1 and 2 if MRD<sup>neg</sup> following HR1 before proceeding to SCT if a suitable donor was available or to Protocol II. MHR patients who were MRD positive after HR2 proceeded to HR3 with a further MRD sample collected on recovery prior to proceeding to HR4. If MRD<sup>neg</sup> after HR3, MHR patients proceeded to Protocol II. MHR patients who remained MRD positive were offered SCT if a suitable donor was identified or completed HR4-6 if no donor was available before proceeding to Protocol II. HR/VHR patients who were MRD positive after HR3 were offered SCT if a suitable donor could be identified or completed HR4-6 before proceeding to Protocol II.

**Figure S2. Impact of Risk Group and Phenotype on Outcomes.** (A) Risk group higher than MR was associated with 3-year DFS of 63.4% (95% CI, 47.5-79.3) versus 84.0% (95%CI, 71.2-96.9) in the SR/MR cohort (HzR 2.40,  $p=0.077$ ) and (B) 3-year OS of 69.3% (95%CI, 54.2-84.4) versus 90.9% (95%CI, 79.3-100.0) in the SR/MR cohort (HzR 4.27,  $p=0.025$ ). (C) T-cell phenotype was associated with a 3-year DFS of 85.7% (95%CI 70.7-100.7) versus 70.8% for B-cell phenotype (HzR 2.57,  $p=0.132$ ) and (D) 3-year OS of 87.0% (95%CI, 73.2-100.0) versus 70.7% (95%CI, 58.5-82.9) in B-cell phenotype (HzR 1.84,  $p=0.276$ )

**Figure S3. Overall Survival Following Relapse.** Kaplan-Meier (KM) estimate of overall survival following relapse. Estimated 6 month overall survival 66.7% (95%CI, 44.9-88.4) and 1 year overall survival 33.3% (95%CI, 10.8-55.9). As of last follow up, 22% of relapsed patients remain alive.
